# Supplementary material for: Equid alphaherpesvirus 1 from Italian Horses: Evaluation of the Variability of the ORF30, ORF33, ORF34 and ORF68 Genes
Source: MDPI journal article supplement (doi:10.3390/v11090851), 2019-09-13
Supplement: s1 [file s1]

**Supplementary Table 1:** GenBank Accession Numbers of selected sequences obtained in this study. Only 23 out of 57 sequences obtained were deposited in order to avoid that too many identical sequences were included in GenBank. Sequences obtained but not deposited in GenBank because identical to other deposited sequences are indicated by the abbreviation “Idt” followed by the GenBank Accession Number of the deposited identical sequence. (-) means that PCR products for sequencing or sequences were not obtained or that low quality sequences were obtained.

| Code          | GenBank Accession Number |              |              |              |
|---------------|--------------------------|--------------|--------------|--------------|
|               | ORF30                    | ORF33        | ORF34        | ORF68        |
| <b>08m27</b>  | Idt MN226968             | MN226970     | Idt MN226976 | MN226985     |
| <b>08m160</b> | Idt MN226969             | -            | MN226974     | -            |
| <b>09m34</b>  | Idt MN226969             | Idt MN226971 | MN226975     | -            |
| <b>09m45</b>  | Idt MN226969             | MN226971     | Idt MN226976 | MN226986     |
| <b>09m68</b>  | Idt MN226969             | Idt MN226971 | Idt MN226976 | -            |
| <b>09m142</b> | Idt MN226969             | MN226972     | MN226976     | MN226987     |
| <b>09m209</b> | MN226969                 | -            | MN226977     | MN226988     |
| <b>09m217</b> | Idt MN226969             | -            | MN226978     | -            |
| <b>10m01</b>  | Idt MN226969             | Idt MN226970 | Idt MN226976 | Idt MN226987 |
| <b>10m106</b> | Idt MN226969             | Idt MN226971 | MN226979     | -            |
| <b>17m07</b>  | Idt MN226969             | -            | Idt MN226976 | -            |
| <b>17m13</b>  | Idt MN226969             | Idt MN226971 | MN226980     | -            |
| <b>17m15</b>  | Idt MN226969             | Idt MN226971 | MN226981     | -            |
| <b>18m30</b>  | Idt MN226969             | -            | MN226982     | MN226989     |
| <b>19m04</b>  | Idt MN226969             | -            | MN226983     | -            |
| <b>19m05</b>  | Idt MN226969             | -            | MN226984     | -            |
| <b>19m08</b>  | Idt MN226969             | -            | Idt MN226976 | -            |
| <b>19m10</b>  | MN226968                 | MN226973     | Idt MN226976 | MN226990     |
| <b>19m13</b>  | Idt MN226969             | -            | Idt MN226976 | -            |
| <b>19m14</b>  | Idt MN226969             | -            | Idt MN226976 | -            |
